# Supplementary material for: Theoretical investigation of an arsenene/g-C 6 N 6 van der Waals heterojunction: a direct Z-scheme system with high photocatalytic efficiency
Source: Royal Society of Chemistry journal article supplement (doi:10.1039/d5cp00081e), 2025-01-01
Supplement: d5cp00081e1.pdf [file d5cp00081e1.pdf]

## Supporting information

### **Theoretical Investigation of Arsenene/g-C<sub>6</sub>N<sub>6</sub> Van Der Waals**

#### **Heterojunction: Direct Z-Scheme with High Photocatalytic Efficiency**

Zhengdong Sun<sup>a</sup>, Jiaxin Ma<sup>a</sup>, Junhao Zhu<sup>a</sup>, Yifei Shen<sup>a</sup>, Xiao Wang<sup>a</sup>, Meng Zhang<sup>\*a</sup>, Kaiyi Zhen<sup>\*b</sup>

<sup>a</sup> School of Physics, East China University of Science and Technology, Shanghai 200237.

<sup>b</sup> School of Food and Biological Engineering, Jiangsu University, Zhenjiang, Jiangsu, 212013.

\* Corresponding author: E-mail: mzhang@ecust.edu.cn (M. Zhang); kaiyizheng@ujs.edu.cn (K. Zheng)

Fig. S1: The diagram of the variation of hydrogen adsorption energy under biaxial strain ranging from -6% to +6%

Fig. S2: The diagram of adsorption intermediates for HER

Fig. S3: The diagram of adsorption intermediates for OER

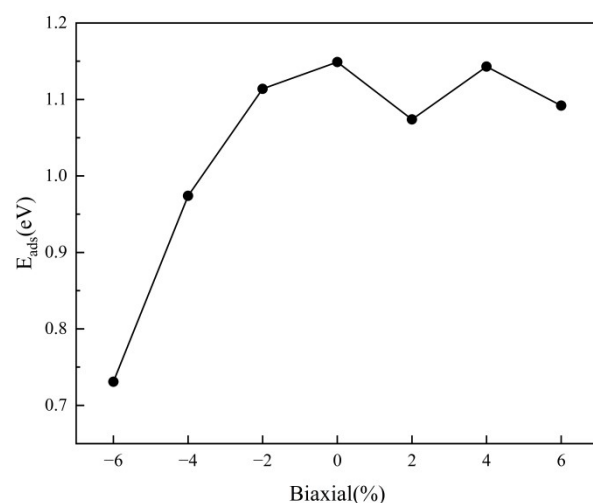

Fig. S 1 Variation of hydrogen adsorption energy under biaxial strain ranging from -6% to +6%. (positive E<sub>ads</sub> values indicate non-spontaneous adsorption, requiring external energy)

HER is conducted at arsenene layer and OER at g-C<sub>6</sub>N<sub>6</sub> layer. Fig. S2 and Fig. S3 show the detailed diagrams of adsorption intermediates for HER and OER,

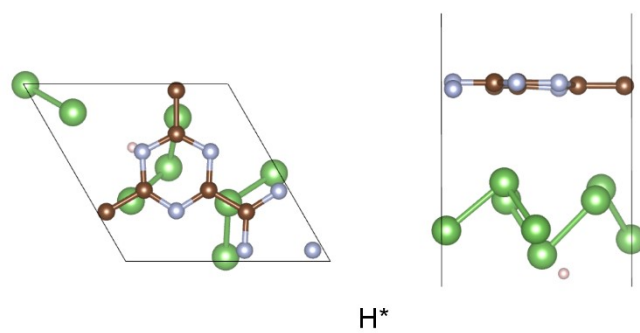

Fig. S 2 The diagram of adsorption intermediates for HER

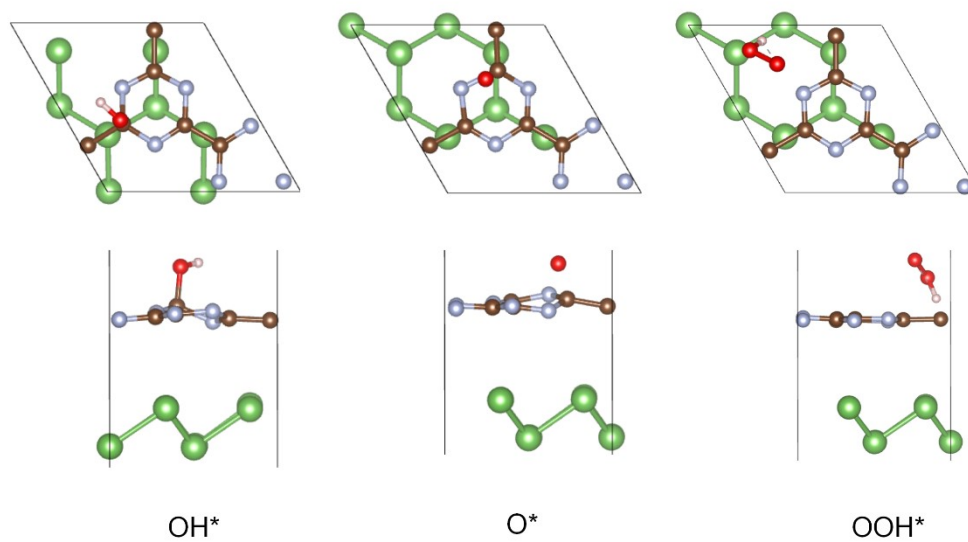

Fig. S 3 The diagram of adsorption intermediates for OER
